# Supplementary material for: The Influence of Different Tonsillar Hypertrophy Types on Dentofacial and Craniofacial Development in Children with Mixed Dentition
Source: Research Square preprint supplement (doi:10.21203/rs.3.rs-7357398/v1), 2025-09-12
Supplement: Supplementary file 1 [file efd2ce709ed3a62984244735.docx]

**Table. S1**

*Definitions of cephalometric hard tissue landmarks used in this study*

| Abbreviation | Full Term | Definition |
| --- | --- | --- |
| P | Porion | The most superior point of the external auditory canal. |
| O | Orbitale | The lowest point on the Infraorbital rim. |
| S | Sella | The center of the sella turcica. |
| N | Nasion | The most anterior point of the frontonasal suture. |
| B | Supramental | The deepest point on the bony contour between the infradentale and pogonion. |
| Po | Pogonion | The most anterior point on the chin. |
| Me | Menton | The most inferior point on the the chin. |
| Gn | Gnathion | The midpoint between pogonion and menton. |
| Go | Gonion | The most posterior-inferior point on the mandibular angle. |
| Ar | Articulare | The intersection of the posterior border of the mandibular condylar neck and inferior border of the cranial base. |
| Co | Condylion | The most superior point on the mandibular condyle. |
| A | Subspinale | The deepest point between the superior alveolar crest point and the anterior nasal spine. |
| U6 Occlusal | Upper First Molar Occlusal Point | The highest point on the occlusal surface of the upper first molar. |
| L6 Occlusal | Lower First Molar Occlusal Point | The highest point on the occlusal surface of the lower first molar. |
| L1 Tip | Lower Incisor Tip | The incisal tip of the mandibular central incisor. |
| L1 Root | Lower Incisor Root Apex | The apex of the mandibular central incisor root. |
| U1 Tip | Upper Incisor Tip | The incisal tip of the maxillary central incisor. |
| U1 Root | Upper Incisor Root Apex | The apex of the maxillary central incisor root. |

**Table. S2**

*Definitions of cephalometric soft tissue landmarks used in this study*

| Landmark | Definition |
| --- | --- |
| Tip of Nose | The most anterior point of the nasal tip. |
| Upper Lip | The most anterior point on the contour of the upper lip, located at its midpoint. |
| Lower Lip | The most anterior point on the contour of the lower lip. |
| S.T. Pogonion | The most anterior point on the soft tissue contour of the chin. |

**Table. S3**

*Definitions of Reference Planes used in this study*

| Reference Plane | Definition |
| --- | --- |
| SN Plane (SN) | A line connecting Sella (S) and Nasion (N), representing the anterior cranial base plane. |
| Frankfort Horizontal Plane (FH) | A line connecting Porion (P) and Orbitale (O), used as the horizontal reference plane. |
| Mandibular Plane (MP) | A line connecting Gonion (Go) and Gnathion (Gn), representing the lower border of the mandible. |
| Ar-Go Plane | A line connecting Articulare (Ar) and Gonion (Go), representing the ramus of the mandible. |
| Facial Plane (N-Po) | A line connecting Nasion (N) and Pogonion (Po), indicating sagittal jaw position. |
| Occlusal Plane (OP) | A line connecting the midpoint of first molar occlusion and the midpoint between upper and lower central incisors. |
| Y-Axis | A line connecting Sella (S) and Gnathion (Gn), indicating the growth direction of the mandible. |
| E-Plane | A line connecting the tip of the nose and soft tissue pogonion, used to assess lip protrusion. |

**Table. S4**

*Definitions of skeletal cephalometric measurements used in this study*

| Measurement | Unit | Definition |
| --- | --- | --- |
| SN-Ar | ° | Angle between the line from Sella (S) to Articulare (Ar) and the SN plane. |
| SN | mm | Length from Sella (S) to Nasion (N). |
| S-Ar | mm | Length from Sella (S) to Articulare (Ar). |
| Ar-Go-Me | ° | Angle between the line from Gonion (Go) to Menton (Me) and the Ar-Go Plane. |
| Go-Gn | mm | Length from Gonion (Go) to Gnathion (Gn). |
| Ar-Go-Na (Go1) | ° | Upper angle formed by dividing the mandibular angle (Ar-Go-Me) through point N. |
| Na-Go-Me (Go2) | ° | Lower angle formed by dividing the mandibular angle (Ar-Go-Me) through point N. |
| Ar-Go | mm | Height of the mandibular ramus from Articulare (Ar) to Gonion (Go). |
| SNA | ° | Angle formed by Sella (S), Nasion (N), and Point A. |
| SNB | ° | Angle formed by Sella (S), Nasion (N), and Point B. |
| ANB | ° | Angle formed by Point A, Nasion (N), and Point B. |
| NA-APo | ° | Angle between the line N-A and line A-Po. |
| S-Ar-Go | ° | Angle between Sella (S)–Articulare (Ar) and the Ar-Go Plane. |
| the Three Angle | ° | Sum of SN-Ar, Ar-Go-Me, and S-Ar-Go angles. |
| SN/Go-Gn (Jarabak Anterior Ratio) | *100 | Jarabak ratio: ratio of anterior cranial base plane length to mandibular body length. |
| SN-MP | ° | Angle between mandibular plane (MP) and SN plane. |
| N-Go | mm | Length from Nasion (N) to Gonion (Go). |
| Y-axis length | mm | Length from Sella (S) to Gnathion (Gn). |
| Facial Angle (NP-FH) | ° | Angle between the facial plane (N-Po) and Frankfort horizontal plane (FH). |
| Posterior Face Height (S-Go) | mm | Length from Sella (S) to Gonion (Go). |
| Anterior Face Height (Na-Me) | mm | Length from Nasion (N) to Menton (Me). |
| P/A Face Height (S-Go/Na-Me) | % | Ratio of posterior face height (S-Go) to anterior face height (Na-Me). |
| Y-axial Angle (SGn-SN) | ° | Angle between Y-axis and SN plane. |

**Table. S5**

*Definitions of Dental cephalometric measurements used in this study*

| Measurement | Unit | Definition |
| --- | --- | --- |
| IMPA (L1-MP) | ° | Angle between the long axis of the mandibular central incisor and the mandibular plane (MP). |
| FMIA (L1-FH) | ° | Angle between the long axis of the mandibular central incisor and the Frankfort horizontal plane (FH). |
| L1-NP | mm | Perpendicular distance from the tip of the mandibular central incisor to the facial plane (N-Po). |
| U1-NP | mm | Perpendicular distance from the tip of the maxillary central incisor to the facial plane (N-Po). |
| U1-SN | ° | Angle between the long axis of the maxillary central incisor and the SN plane. |
| MP-OP | ° | Angle between the mandibular plane (MP)and the occlusal plane (OP). |
| Interincisal Angle (U1-L1) | ° | Angle formed between the long axes of the upper and lower central incisors. |

**Table. S6**

*Definitions of Soft Tissue cephalometric measurements used in this study*

| Measurement | Unit | Definition |
| --- | --- | --- |
| LL-E | mm | Perpendicular distance from the most anterior point of the lower lip to the E-Plane. |
| UL-E | mm | Perpendicular distance from the most anterior point of the upper lip to the E- Plane. |

**Table S7**

*Group assignment scheme*

| Measurement variables | Group A | Group B | Group C | Group D | |
| --- | --- | --- | --- | --- | --- |
| D1 | D2 |
| Brodsky grade (Transverse) | 0-1 | 2-4 | 0-1 | 2-4 | |
| 2 | 3-4 |
| TS/TOAS (Anteroposterior) | ＜50% | ＜50% | ≥50% | ≥50% | |
| ≥50% | ≥50% |

Group A = non-hypertrophic or mildly hypertrophic; Group B = transverse hypertrophy; Group C = anteroposterior hypertrophy; Group D = combined transverse and anteroposterior hypertrophy; D1 = Brodsky grade 2; D2 = Brodsky grade 3-4; TS = Tonsil Size; TOAS = Total Oropharyngeal Airway Space; TS/TOAS = the degree of anteroposterior tonsillar hypertrophy.

Table. S8

*Pairwise comparison of anterior malocclusion patterns among groups*

| Group | *p* | | | |
| --- | --- | --- | --- | --- |
| Anterior crossbite | Edge-to-edge bite | Deep overbite | Increased overjet |
| A vs B | - | 0.240 | 0.156 | 0.754 |
| A vs C | 0.013* | 0.017* | 0.044* | 0.500 |
| A vs D | 0.002** | 0.004** | 0.005** | 0.207 |
| B vs C | 0.003** | 0.153 | 0.623 | 0.750 |
| B vs D | 0.000*** | 0.042* | 0.373 | 0.570 |
| C vs D | 0.525 | 0.838 | 0.998 | 0.998 |
| D1 vs D2 | 0.111 | 0.565 | 0.347 | 0.230 |

**p <* 0.05，***p* < 0.01，****p* < 0.001

Table. S9

*Pairwise Comparisons of Sagittal Skeletal Pattern Classifications Among Groups*

| Group | *p* | | |
| --- | --- | --- | --- |
| Skeletal Class I | Skeletal Class II | Skeletal Class III |
| A vs B | 0.855 | 0.911 | 0.484 |
| A vs C | 0.834 | 0.016* | 0.001* |
| A vs D | 0.582 | 0.001** | 0.000*** |
| B vs C | 0.971 | 0.014* | 0.002** |
| B vs D | 0.704 | 0.001** | 0.000*** |
| C vs D | 0.755 | 0.962 | 0.711 |
| D1 vs D2 | 0.205 | 0.923 | 0.184 |

**p <* 0.05，***p* < 0.01，****p* < 0.001
